# Supplementary material for: Effect of Cenobamate on Cognition in Patients with Drug-Resistant Epilepsy with Focal Onset Seizures: An Exploratory Study
Source: PubMed Central journal article supplement — CNS Drugs. 2024 Jan 24;38(2):141–51. doi: 10.1007/s40263-024-01063-6 (PMC10881647; doi:10.1007/s40263-024-01063-6), 2024-01-24
Supplement: 40263_2024_1063_MOESM1_ESM.pdf [file 40263_2024_1063_MOESM1_ESM.pdf]

**Article title:**

Effect of cenobamate on cognition in patients with drug-resistant epilepsy with focal onset seizures: an exploratory study

**Journal:**

CNS Drugs

**Authors:**

Pedro Serrano-Castro<sup>1,2,3,4</sup>, Teresa Ramirez-Garcia<sup>1,4</sup>, Pablo Cabezudo-Garcia<sup>1,2,4</sup>, Guillermina Garcia-Martin<sup>1,2,4</sup>, Juan De La Parra<sup>5</sup>

**Author affiliations:**

1. Instituto de Investigación Biomédica de Málaga (IBIMA-Plataforma Bionand), Málaga, Spain.
2. Hospital Regional Universitario Málaga, Málaga, Spain.
3. Departamento de Medicina y Dermatología, Universidad de Málaga, Spain.
4. Red Andaluza de Investigación Clínica y Traslacional (Neuro-RECA), Málaga, Spain.
5. Angelini Pharma, Barcelona, Spain

**Corresponding author:**

Pedro Serrano-Castro, M.D.; Ph.D.

[pedro.serrano.c@gmail.com](mailto:pedro.serrano.c@gmail.com). <https://orcid.org/0000-0002-3414-2707>

**Online Resource 1. Baseline characteristics by 50% responder status at 6 months**

| <b>Characteristic</b>        | <b>50% responders<br/>n=14</b> | <b>Nonresponders<br/>n=6</b> |
|------------------------------|--------------------------------|------------------------------|
| Gender                       |                                |                              |
| Female, n (%)                | 7 (63.6)                       | 4 (36.4)                     |
| Male, n (%)                  | 7 (77.8)                       | 2 (22.2)                     |
| Age, years                   |                                |                              |
| Mean (SD)                    | 38.7 (7.0)                     | 45.8 (11.5)                  |
| Median (range)               | 37.5 (25–54)                   | 46.0 (33–63)                 |
| Age at epilepsy onset, years |                                |                              |
| Mean (SD)                    | 17.9 (12.5)*                   | 12.8 (10.5)                  |
| Median (range)               | 15.0 (2–47)*                   | 12.5 (0–29)                  |
| Epileptogenic focus          |                                |                              |
| Bitemporal                   | 2 (50)                         | 2 (50)                       |
| Right temporal               | 3 (100)                        | 0 (0)                        |
| Left temporal                | 5 (71.4)                       | 2 (28.6)                     |
| Right frontal                | 1 (100)                        | 0 (0)                        |
| Left frontal                 | 2 (50)                         | 2 (50)                       |
| Multifocal                   | 1 (100)                        | 0 (0)                        |

\*n=13.

SD, standard deviation.

**Online Resource 2. Change in total DDD ratio between baseline and 6 months according to mechanism of action of concomitant ASMs.**

| Mechanism of action     | Total DDD ratio at baseline | Total DDD ratio at 6 months | Change from baseline | Change from baseline | P value* |
|-------------------------|-----------------------------|-----------------------------|----------------------|----------------------|----------|
|                         | Mean (SD)                   | Mean (SD)                   | Mean (SD)            | %                    |          |
| All (N=20)              | 3.6 (1.6)                   | 2.6                         | -1 (0.8)             | -29.3                | <0.0001  |
| AMPA <sub>r</sub> (n=8) | 0.7 (0.4)                   | 0.4 (0.5)                   | -0.3 (0.2)           | -61.5 (42.5)         | 0.0016   |
| Benzodiazepines (n=14)  | 0.8 (0.5)                   | 0.4 (0.5)                   | -0.4 (0.6)           | -51.2 (52.1)         | 0.035    |
| CCB (n=4)               | 0.8 (0.4)                   | 0.7 (0.3)                   | -0.1 (0.1)           | -7.6 (9.3)           | 0.19     |
| SCB (n=18)              | 2 (1.1)                     | 1.5 (1.1)                   | -0.5 (0.5)           | -26.8 (22.7)         | 0.0005   |
| SV2A (n=9)              | 1.8 (0.4)                   | 1.5 (0.7)                   | -0.3 (0.7)           | -17.6 (33.4)         | 0.17     |

\*Cenobamate is not included in the DDD ratio computation.

AMPA<sub>r</sub>, AMPA receptor antagonist (perampanel); benzo, benzodiazepines (clobazam, clonazepam, clorazepate, diazepam, phenobarbital); CCB, calcium channel blockers (ethuximide, valproic acid); SCB, sodium channel blockers (carbamazepine, eslicarbazepine acetate, lacosamide, lamotrigine, oxcarbazepine, phenytoin, topiramate, zonisamide); SV2A, synaptic vesicle protein 2A modulators (brivaracetam, levetiracetam); other (acetazolamide, vigabatrin).

**Online Resource 3. Change in cognitive score categories between baseline and 6 months for parameters scored on (A) a scalar or (B) a percentile scoring system.**

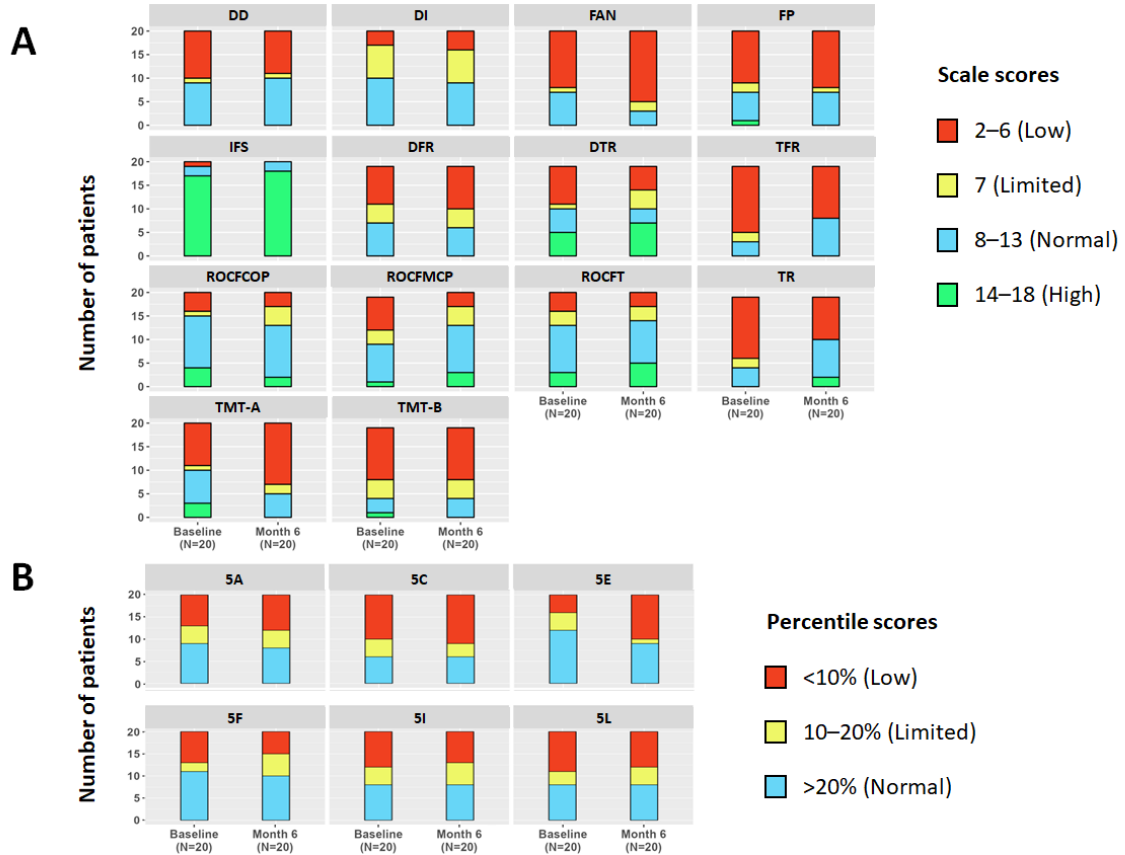

DD, Digit direct; DFR, delayed free recall; DI, Digit inverse; DTR, delayed total recall; FAN, fluency-semantic; FP, fluency-phonometric; IFS, INECO Frontal Screening; ROCF, Rey-Osterrieth Complex Figure; ROCF-COP, ROCF-Copying; ROCF-MCP, ROCF-Copy from memory; ROCF-T; ROCF-Time; TFR, total free recall; TMT, Trail-Making Test; TMT-A, TMT-attention; TMT-B, TMT-processing; TR, total recall; 5A, 5-digit test - alternate; 5C, 5-digit test - counting; 5E, 5-digit test - choice; 5F, 5-digit test - flexibility; 5I, 5-digit test – inhibition; 5L, 5-digit test – reading.

**Online Resource 4. Proportion of patients showing a change in cognitive scores between baseline and 6 months. (A) Change in absolute scores; (B) Reliable Change Index.**

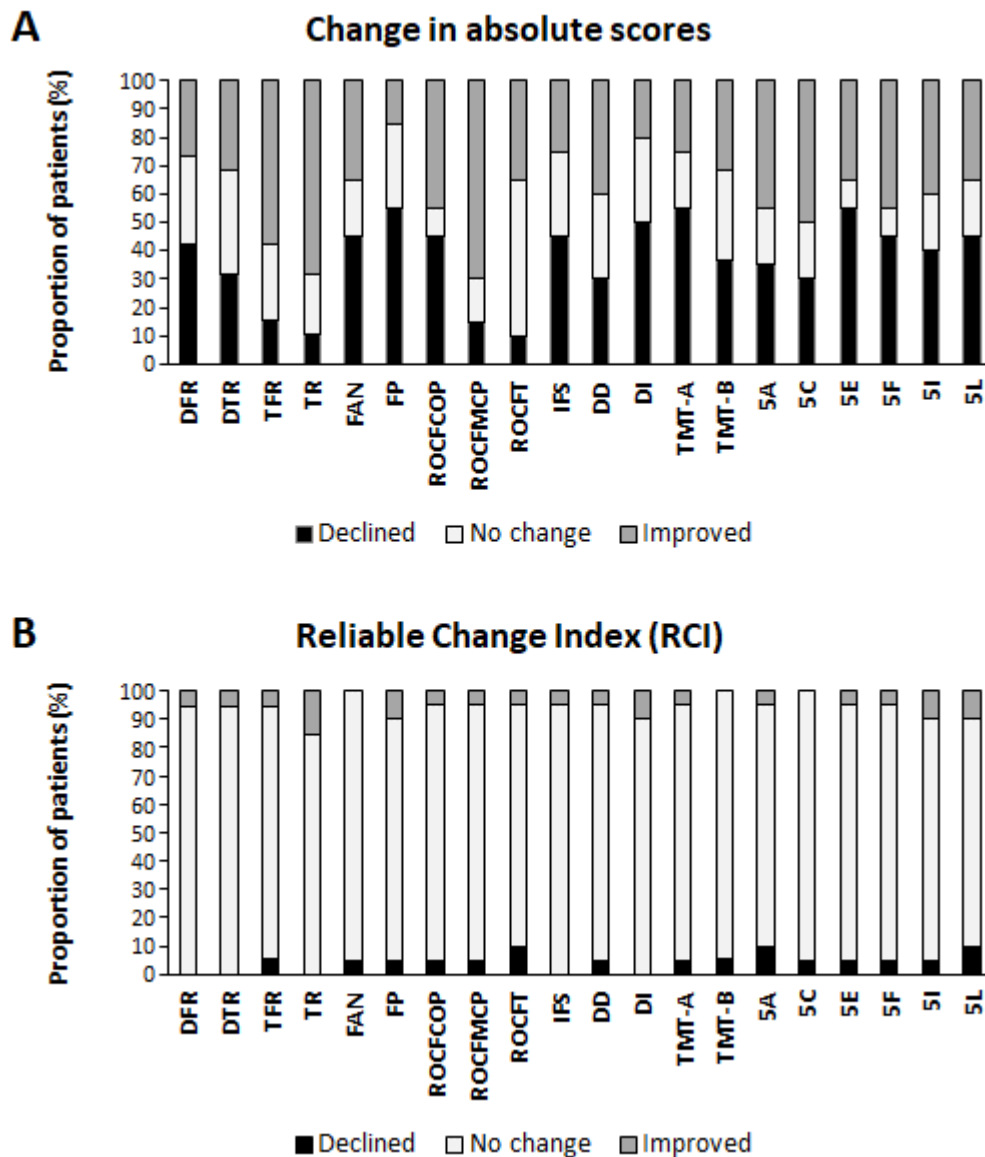

DD, Digit direct; DFR, delayed free recall; DI, Digit inverse; DTR, delayed total recall; FAN, fluency-semantic; FP, fluency-phonometrics; IFS, INECO Frontal Screening; ROCF, Rey-Osterrieth Complex Figure; ROCF-COP, ROCF-Copying; ROCF-MCP, ROCF-Copy from memory; ROCF-T; ROCF-Time; SD, standard deviation; TFR, total free recall; TMT, Trail-Making Test; TMT-A, TMT-attention; TMT-B, TMT-processing; TR, total recall; 5A, alternate; 5C, counting; 5E, choice; 5F, flexibility; 5I, inhibition; 5L, reading.

**Online Resource 5. Change in cognitive parameters between baseline and 6 months in ≥50% responders.**

| <b>Cognition test</b>                                                  | <b>Baseline</b> | <b>6 months</b> | <b>Change from baseline</b> | <b>P value*</b> |
|------------------------------------------------------------------------|-----------------|-----------------|-----------------------------|-----------------|
| <b>FCSRT (verbal episodic memory)</b>                                  |                 |                 |                             |                 |
| TFR <sup>†</sup>                                                       |                 |                 |                             |                 |
| Mean (SD)                                                              | 5.2 (2.7)       | 7.5 (3)         | 2.2 (2)                     | 0.0015          |
| Median (range)                                                         | 5 (2–9)         | 8 (2–12)        | 3 (-1–6)                    |                 |
| DFR <sup>†</sup>                                                       |                 |                 |                             |                 |
| Mean (SD)                                                              | 7.2 (3.4)       | 7.2 (3.2)       | 0.1 (3.5)                   | 0.94            |
| Median (range)                                                         | 7 (2–13)        | 7 (2–13)        | -1 (-5–8)                   |                 |
| TR <sup>†</sup>                                                        |                 |                 |                             |                 |
| Mean (SD)                                                              | 5.5 (3)         | 8.4 (4.7)       | 2.9 (3.2)                   | 0.0064          |
| Median (range)                                                         | 4 (2–11)        | 10 (2–17)       | 2 (-1–9)                    |                 |
| DTR <sup>†</sup>                                                       |                 |                 |                             |                 |
| Mean (SD)                                                              | 9.5 (6.1)       | 10.7 (5.9)      | 1.2 (4.7)                   | 0.36            |
| Median (range)                                                         | 8 (2–18)        | 8 (2–18)        | 0 (-2–16)                   |                 |
| <b>Verbal fluency</b>                                                  |                 |                 |                             |                 |
| FAN                                                                    |                 |                 |                             |                 |
| Mean (SD)                                                              | 5.1 (3)         | 4.8 (2.4)       | -0.3 (2.9)                  | 0.72            |
| Median (range)                                                         | 4 (2–11)        | 6 (2–9)         | -0.5 (-4–4)                 |                 |
| FP                                                                     |                 |                 |                             |                 |
| Mean (SD)                                                              | 6.1 (3.5)       | 5.4 (3.4)       | -0.6 (1.6)                  | 0.17            |
| Median (range)                                                         | 5.5 (2–12)      | 5 (2–12)        | -1 (-3–3)                   |                 |
| <b>ROCF (Visuospatial episodic memory)</b>                             |                 |                 |                             |                 |
| ROCF-COP                                                               |                 |                 |                             |                 |
| Mean (SD)                                                              | 10.9 (4.9)      | 10.4 (3.2)      | -0.6 (2.9)                  | 0.47            |
| Median (range)                                                         | 11 (2–18)       | 11 (5–18)       | 0 (-6–3)                    |                 |
| ROCF-MCP                                                               |                 |                 |                             |                 |
| Mean (SD)                                                              | 8.1 (4.5)       | 10.1 (2.8)      | 2 (3.6)                     | 0.055           |
| Median (range)                                                         | 9 (1–15)        | 10 (5–15)       | 1.5 (-4–9)                  |                 |
| ROCF-T                                                                 |                 |                 |                             |                 |
| Mean (SD)                                                              | 8.8 (4.1)       | 9.5 (4.4)       | 0.7 (2.5)                   | 0.30            |
| Median (range)                                                         | 8.5 (2–16)      | 9.5 (2–17)      | 0 (-5–6)                    |                 |
| <b>IFS &amp; DD/DI (frontal executive function and working memory)</b> |                 |                 |                             |                 |
| IFS                                                                    |                 |                 |                             |                 |
| Mean (SD)                                                              | 18.1 (6.3)      | 18.6 (3.7)      | 0.4 (5.6)                   | 0.78            |
| Median (range)                                                         | 20.5 (2–26)     | 19 (11–26)      | 0 (-5.5–18)                 |                 |
| DD                                                                     |                 |                 |                             |                 |
| Mean (SD)                                                              | 6.3 (2.9)       | 6.6 (2.6)       | 0.4 (2.1)                   | 0.53            |
| Median (range)                                                         | 6 (3–11)        | 8 (3–10)        | 0 (-4–4)                    |                 |

|                                               |                |             |             |              |       |
|-----------------------------------------------|----------------|-------------|-------------|--------------|-------|
| DI                                            | Mean (SD)      | 7.8 (2.6)   | 7.3 (2.6)   | -0.5 (2.8)   | 0.51  |
|                                               | Median (range) | 7.5 (2–13)  | 7.5 (2–13)  | 0 (-5–6)     |       |
| <b>TMT (attention and executive function)</b> |                |             |             |              |       |
| TMT-A                                         | Mean (SD)      | 7.9 (5.7)   | 5.5 (3.5)   | -2.4 (4)     | 0.045 |
|                                               | Median (range) | 7.5 (2–17)  | 5.5 (2–12)  | -0.5 (-9–3)  |       |
| TMT-B <sup>‡</sup>                            | Mean (SD)      | 5.4 (3.1)   | 5.2 (3.2)   | -0.2 (1.7)   | 0.64  |
|                                               | Median (range) | 5.5 (2–12)  | 5 (2–13)    | 0 (-3–3)     |       |
| <b>5-Digit Test (speed of processing)</b>     |                |             |             |              |       |
| 5A                                            | Mean (SD)      | 25.3 (25)   | 28.6 (27.2) | 3.3 (24.4)   | 0.62  |
|                                               | Median (range) | 20 (1–70)   | 20 (1–70)   | 2.5 (-45–69) |       |
| 5C                                            | Mean (SD)      | 19.9 (24.8) | 20 (26.9)   | 0.1 (8.7)    | 0.98  |
|                                               | Median (range) | 7.5 (1–65)  | 7.5 (1–70)  | 3.5 (-20–10) |       |
| 5E                                            | Mean (SD)      | 31.3 (24)   | 22.9 (23.8) | -8.4 (27.5)  | 0.28  |
|                                               | Median (range) | 32.5 (1–75) | 17.5 (1–75) | -14 (-52–44) |       |
| 5F                                            | Mean (SD)      | 26.9 (30.7) | 30.9 (26)   | 4 (42.6)     | 0.73  |
|                                               | Median (range) | 15 (1–98)   | 27.5 (1–70) | 5.5 (-78–69) |       |
| 5I                                            | Mean (SD)      | 21.9 (24.5) | 30.6 (29.7) | 8.8 (38)     | 0.40  |
|                                               | Median (range) | 10 (1–75)   | 17.5 (1–90) | 0 (-55–89)   |       |
| 5L                                            | Mean (SD)      | 26.3 (24.1) | 25.3 (22.4) | -1 (23)      | 0.87  |
|                                               | Median (range) | 22.5 (1–60) | 27.5 (1–60) | -1 (-37–45)  |       |

DD, Digit direct; DFR, delayed free recall; DI, Digit inverse; DTR, delayed total recall; FAN, fluency-semantic; FP, fluency-phonometrics; IFS, INECO Frontal Screening; ROCF, Rey-Osterrieth Complex Figure; ROCF-COP, ROCF-Copying; ROCF-MCP, ROCF-Copy from memory; ROCF-T; ROCF-Time; SD, standard deviation; TFR, total free recall; TMT, Trail-Making Test; TMT-A, TMT-attention; TMT-B, TMT-processing; TR, total recall; 5A, alternate; 5C, counting; 5E, choice; 5F, flexibility; 5I, inhibition; 5L, reading.

**Online Resource 6. Analysis of covariance for each cognitive parameter by 50% responder status, total DDD ratio change from baseline, and baseline parameter value.**

| Cognitive parameter                                  | P values             |                                       |                          |
|------------------------------------------------------|----------------------|---------------------------------------|--------------------------|
|                                                      | 50% responder status | Total DDD ratio change from baseline* | Baseline parameter value |
| <b>FCSRT (verbal episodic memory)</b>                |                      |                                       |                          |
| TFR                                                  | 0.036                | 0.20                                  | 0.16                     |
| DFR                                                  | 0.25                 | 0.026                                 | 0.002                    |
| TR                                                   | 0.97                 | 0.63                                  | 0.20                     |
| DTR                                                  | 0.92                 | 0.087                                 | 0.10                     |
| <b>Verbal fluency</b>                                |                      |                                       |                          |
| FAN                                                  | 0.70                 | 0.075                                 | 0.0004                   |
| FP                                                   | 0.75                 | 0.75                                  | 0.036                    |
| <b>ROCF (visuospatial episodic memory)</b>           |                      |                                       |                          |
| ROFCOP                                               | 0.68                 | 0.13                                  | 0.0011                   |
| ROCFMCP                                              | 0.70                 | 0.30                                  | 0.0045                   |
| ROCFT                                                | 0.18                 | 0.01                                  | 0.32                     |
| <b>Frontal executive function and working memory</b> |                      |                                       |                          |
| IFS                                                  | 0.032                | 0.22                                  | 0.000                    |
| DD                                                   | 0.88                 | 0.75                                  | 0.022                    |
| DI                                                   | 0.83                 | 0.96                                  | 0.011                    |
| <b>TMT (attention and executive function)</b>        |                      |                                       |                          |
| TMT-A                                                | 0.21                 | 0.39                                  | 0.0001                   |
| TMT-B                                                | 0.71                 | 0.025                                 | 0.0014                   |
| <b>5-Digit Test (speed of processing)</b>            |                      |                                       |                          |
| 5A                                                   | 0.43                 | 0.044                                 | 0.04                     |
| 5C                                                   | 0.48                 | 0.05                                  | 0.64                     |
| 5E                                                   | 0.51                 | 0.059                                 | 0.058                    |
| 5F                                                   | 0.40                 | 0.71                                  | 0.0004                   |
| 5I                                                   | 0.78                 | 0.17                                  | 0.0034                   |
| 5L                                                   | 0.84                 | 0.11                                  | 0.059                    |

\*Cenobamate is not included in the DDD computation.

DD, Digit direct; DFR, delayed free recall; DI, Digit inverse; DTR, delayed total recall; FAN, fluency-semantic; FP, fluency-phonometrics; IFS, INECO Frontal Screening; ROCF, Rey-Osterrieth Complex Figure; ROCF-COP, ROCF-Copying; ROCF-MCP, ROCF-Copy from memory; ROCF-T; ROCF-Time; SD, standard deviation; TFR, total free recall;



TMT, Trail-Making Test; TMT-A, TMT-attention; TMT-B, TMT-processing; TR, total recall; 5A, alternate; 5C, counting; 5E, choice; 5F, flexibility; 5I, inhibition; 5L, reading.
